# Supplementary material
Source: HighWire-hosted journal article supplement (https://emj.bmj.com/content/emermed-2018-207948)
Supplement: inline-supplementary-material-2 [file inline-supplementary-material-2.docx]

**Man versus machine: comparison of naked-eye estimation and quantified capillary refill**

**(emermed-2018-207948) Rani Toll John et al..**

**Sammanfattning**

**Bakgrund**

Kapillär återfyllnadstid (KÅ) bedöms traditionellt genom visuell, subjektiv skattning av tiden det tar för huden att återfå sin ursprungsfärg efter 5 sekunders tryck som får huden att blekna. Få studier har fokuserat på reproducerbarhet hos observatörer eller använt objektiva kvantifieringstekniker för att bedöma tiden till återkomst av ursprungsfärgen. Denna studie jämför visuell, subjektiv bedömning av KÅ med kvantifierad KÅ (kKÅ) genom polarisationsspektroskopi. Studien jämför även grad av överensstämmelse emellan olika observatörer och hos samma observatör vid upprepad visuell mätning.

**Metod**

En film med 18 videor på KÅ tester (visade i slumpvis utvald, bestämd ordning) utförda på friska vuxna försökspersoner, bedömdes av ett bekvämlighetsurval av 14 doktorer, 15 sjuksköterskor och 19 sekreterare (Akutkliniken, Universitetssjukhuset i Linköping, september till november 2017). Observatörerna ombads skatta tiden till ursprunglig hudfärg och bedöma om det var ”snabb”, ”normal” eller ”långsam” KÅ. Grad av överenstämmelse mellan kKÅ tider och motsvarande visuellt skattade KÅ tider jämfördes med Kruskal-Wallis test. Tre videor visades två gånger utan observatörernas vetskap för att mäta repeterbarhet för varje observatör. Kategoriska bedömningar hos varje observatör jämfördes och beräknades med Cohen’s Kappa-analys. Analys av repeterbarhet emellan observatörer gjordes och plottades med hjälp av multiple-observer Bland-Altman plotting. Skillnader emellan professionerna vid visuell subjektiv skattning analyserades med ANOVA.

**Resultat**

Visuell subjektiv KÅ och kKÅ skiljer sig substantiellt och överenstämmelse vid kategorisk skattning (visuell, subjektiv skattning vs kKÅ klassificering) var dålig (Cohen’s Kappa 0.27). Repeterbarhet för varje observatör varierade emellan 6 och 60%. Grad av överensstämmelse emellan observatörerna var låg visat med Bland-Altman plotting med en 95% grad av överensstämmelse med ett medel på ±1.98 s för doktorer, ±1.6 s för sjuksköterskor och ±1.75 s för sekreterare. Skillnaderna emellan yrkesgrupperna i KÅ tidsskattning skiljde sig inte signifikant.

**Konklusion**

Vår studie visar dålig reproducerbarhet vid visuell subjektiv skattning både emellan observatörer och hos samma observatör. Den visuella subjektiva skattningen av KÅ skiljde sig signifikant från kKÅ.

*This abstract has been translated and adapted from the original English-language content. Translated content is provided on an "as is" basis. Translation accuracy or reliability is not guaranteed or implied. BMJ is not responsible for any errors and omissions arising from translation to the fullest extent permitted by law, BMJ shall not incur any liability, including without limitation, liability for damages, arising from the translated text.*
